# Supplementary material
Source: PubMed Central journal article supplement (PMC8273111)
Supplement: NIHMS1695949-supplement-Supplemental_Table.pdf [file NIHMS1695949-supplement-Supplemental_Table.pdf]

**Supplemental Table S1. Patient and Provider Interview Guides**

|                                                                                                  | <b>Structure</b>                                                                                                                                                                                                                                                                                                                                                                                                                                                                                                             | <b>Process</b>                                                                                                                                                                                                                                                                                        | <b>Outcomes</b>                                                                                                                                                                       |
|--------------------------------------------------------------------------------------------------|------------------------------------------------------------------------------------------------------------------------------------------------------------------------------------------------------------------------------------------------------------------------------------------------------------------------------------------------------------------------------------------------------------------------------------------------------------------------------------------------------------------------------|-------------------------------------------------------------------------------------------------------------------------------------------------------------------------------------------------------------------------------------------------------------------------------------------------------|---------------------------------------------------------------------------------------------------------------------------------------------------------------------------------------|
| <i>Patients</i>                                                                                  | Can you tell us about your experience with walking and being active while you've been in the hospital?                                                                                                                                                                                                                                                                                                                                                                                                                       | What motivates you to get up and walk? What gets in the way of getting up and walking?                                                                                                                                                                                                                | What have your providers, your doctors, nurses, PTs, OTs, said about staying active while you are in the hospital? How do you feel about what they say?<br>PROBE: frequency, content? |
| <i>Providers<br/>(Hospitalists,<br/>Residents, Nurses,<br/>Certified Nursing<br/>Assistants)</i> | How would you describe good mobility in the hospital and how would you describe poor mobility? PROBE: number of steps, other metrics?                                                                                                                                                                                                                                                                                                                                                                                        | What data do you collect on patient mobility during a typical hospital stay? How often do you collect this data?<br>_____<br>What type of mobility data would you like to collect?                                                                                                                    | In your experience, why is mobility important to your patients?                                                                                                                       |
| <i>Physical<br/>Therapists (PTs)<br/>and Occupational<br/>Therapists (OTs)</i>                   | We know that fall prevention is a top priority in hospitals. From your perspective, how does the focus on preventing falls influence mobility among patients over 60?<br>_____<br>In your experience, what are some of the other barriers to mobility in the hospital for your older patients?<br>_____<br>What is your perception of the role of PTs and OTs in promoting mobility in general medicine patients over 60?<br>_____<br>What do other providers perceive as the role of PTs and OTs? PROBE: doctors and nurses | We know that PTs and OTs are responsible for providing extensive documentation at each patient encounter. How do you think the documentation is being used by nurses and doctors?<br>_____<br>What is the most important thing you put in your notes? What do you want others to read about patients? | How should the notes you write be used to help patient mobility?                                                                                                                      |
